# Supplementary material
Source: HighWire-hosted journal article supplement (https://jnm.snmjournals.org/highwire/filestream/99040/field_highwire_adjunct_files/0/234526_Supplemental_Data.pdf)
Supplement: 234526_Supplemental_Data.pdf [file 234526_Supplemental_Data.pdf]

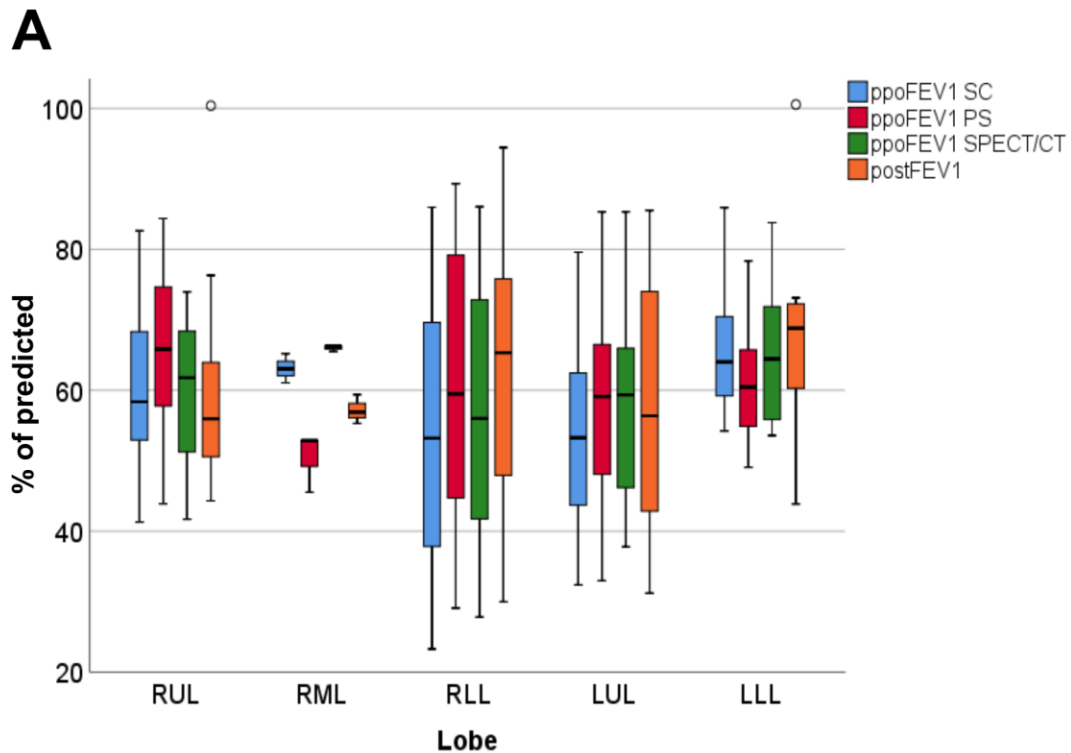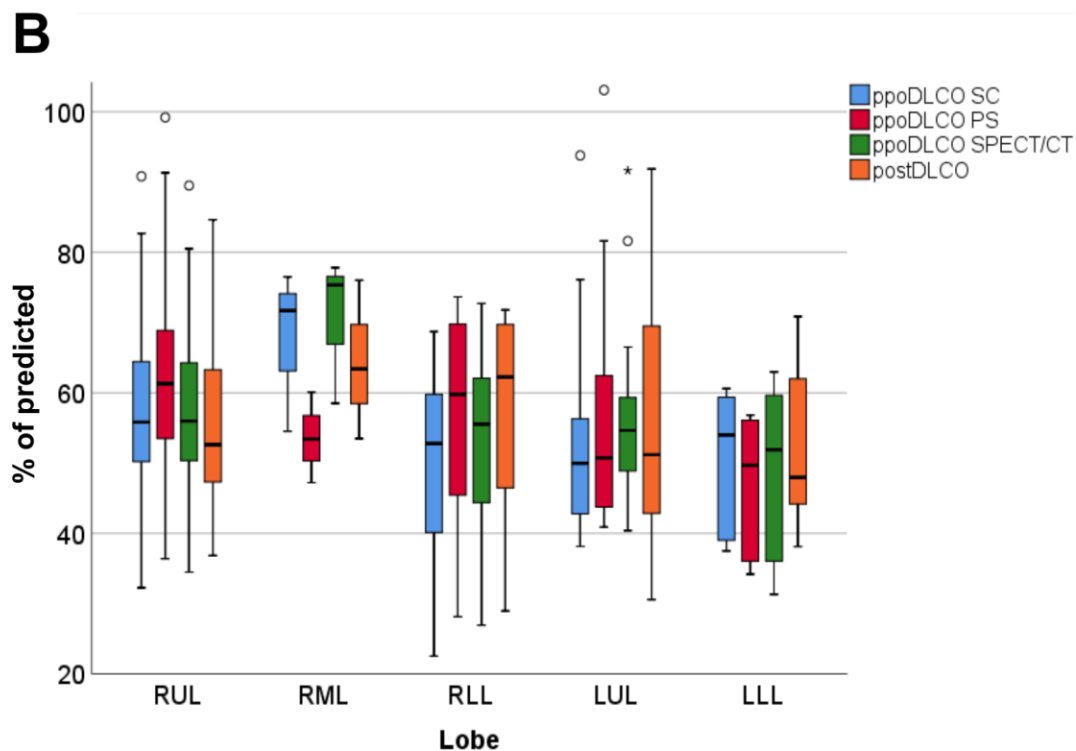

**Supplemental Figure 1:** Box plot chart comparing the predicted and post-operative FEV1 (A) and DLCO (B) according to the resected lobes in the VATS lobectomy subgroup (n=60). The thick line in the middle of the box represents the median. The top and bottom box lines show the first and third quartiles. The whiskers show the maximum and the minimum values, with the exceptions of outliers (circles) and extremes (asterisks). Outliers are at least 1.5 box lengths from the median and extremes are at least three box lengths from the median.
